# Supplementary material
Source: publisher figshare collection journal article supplement (https://acs.figshare.com/ndownloader/files/13189679)
Supplement: Supplementary file 1 [file 13189679]

## Supporting Information

# High-Efficiency Air-Stable Colloidal Quantum Dot Solar Cells Based on Potassium Doped ZnO Electron Accepting Layer

*Randi Azmi,<sup>†</sup> Gabseok Seo,<sup>‡</sup> Tae Kyu Ahn,<sup>‡</sup> and Sung-Yeon Jang<sup>†\*</sup>*

<sup>†</sup>Department of Chemistry, Kookmin University, 77 Jeongneung-ro, Seongbuk-gu, Seoul 136-702, Republic of Korea

<sup>‡</sup> Department of Energy Science, Sungkyunkwan University, 2066 Seobu-ro, Jangan-gu, Suwon, Gyeonggi-do 16419, Republic of Korea

Email: [syjang@kookmin.ac.kr](mailto:syjang@kookmin.ac.kr)

## Experimental section

*Synthesis of PbS-CQD:* Lead oxide (PbO trace-metals basis, 99.999%), hexamethyldisilathiane (TMS<sub>2</sub>S, synthesis grade), oleic acid (OA, technical grade, 90%), 1-octadecene (ODE, 90%), olaylamine and 1,3-propanedithiol (PDT, >99%) were purchased from Sigma-Aldrich and used without further purification. The oleate-capped PbS-CQD was synthesized via a rapid hot injection method by following a reported procedure with slight modification.<sup>S1</sup> Briefly, 2 mmol of PbO and 4 mmol of OA were dissolved in 20 mL of ODE in a three-necked flask by heating the mixture to 100 °C and keeping it under vacuum overnight. A portion (180 µL) of TMS<sub>2</sub>S in ODE was injected into the lead oleate solution under N<sub>2</sub> gas. The PbS-CQDs were then purified by adding 40 mL acetone one time and then the precipitate was diluted in toluene (150 mg/mL) for the next solution-phase halide treatment. The solution-phase treatment using PDMII ligand was adapted from a previous article.<sup>S2</sup> Finally, the precipitate was dried in a vacuum chamber to remove any residual solvent before dilution in octane (70 mg/mL).

*Photovoltaic device fabrication:* The ITO/glass substrates were cleaned sequentially in acetone and isopropyl alcohol for 15 min each. After drying in a vacuum oven, the ITO/glass substrates were put in the UV ozone chamber for 20 min prior to use. The ZnO-ETLs were prepared by the in situ sol-gel method described in our previous articles.<sup>S3-S5</sup> The ZnO was spin-cast at 2000 rpm and then annealed at 130 °C to get thickness of ≈40 nm. A 15 mM solution of KOH in deionized (DI) water was prepared, and then the ZnO-ETL film was dipped for 1 min followed by washing with DI water and annealing at 100 °C. PbS-CQD active layers were deposited using a conventional layer-by-layer (LBL) spin coating process under ambient atmosphere. A PbS-CQD solution (30 µl in octane) was dropped and spin-coated at 2000 rpm for 10 sec following solid-state exchange (SSE) using 4 mM PDMII solution in ethanol until reaching a thickness of ≈250 nm (four layer-cycles). Two wash cycles were done for each layer to remove unbound ligands at 2000 rpm with the same program. A conventional thin layer of PDT-exchanged PbS-CQD (thickness ≈50 nm, 1 layer-cycle) was used as a hole-accepting layer. The

concentration of PDT was 2 mM in acetonitrile. The unbound ligands were removed by two wash cycles with acetonitrile. The 100 nm-thick Au used as anode was deposited using thermal evaporation at low pressure ( $<10^{-6}$  Torr).

**Device Analysis:** The current density-voltage ( $J$ - $V$ ) characteristics were determined using a Keithley 2401 source unit under the light intensity AM 1.5 G ( $100 \text{ mWcm}^{-2}$ ) illumination (Newport). The spectral mismatch was calibrated using a KG-5 filter-covered mono-silicon standard cell (Newport). A metal mask was used with active area  $0.0518 \text{ cm}^2$ . External quantum efficiency (EQE) spectra were obtained by passing the output of a 400 W Xenon lamp through a monochromator and filters. The collimated output of the monochromator was measured through a 1 mm aperture (ORIEL, QuantX 300). The calibration was performed using a 603621 Calibrated Silicon and Germanium Reference Detector. The wavelength values were scanned at chopping frequency of 4 Hz from 300 nm to 850 nm. Transient photo-voltage (TPV) measurements (McScience, K3400) were performed at steady state under continuous illumination. The system was perturbed using a green ( $\lambda = 535 \text{ nm}$ ) pulsed laser at 1 Hz. The resulting voltage transient was acquired using a DPO 3052 Tektronix Digital Phosphor Oscilloscope (impedance  $1 \text{ M}\Omega$ ). The recombination lifetime was extracted from the decay curves using mono-exponential fitting. Capacitance-voltage ( $C_p$ - $V$ ) measurement of solar cell devices was performed using an impedance analyzer (Ivium Stat.) in dark and the AC signal was set to 1 kHz frequency. The depletion width was calculated using the equation (S1):

$$W_D(V) = \frac{1}{N_a} \sqrt{\frac{2\epsilon_r\epsilon_0(V_{bi}-V)}{e\left(\frac{1}{N_a}+\frac{1}{N_b}\right)}} \quad (\text{S1})$$

where  $\epsilon_r$  is the PbS-CQDs dielectric constant ( $\epsilon_r = 18$ ),  $N_a$  is the PbS-CQDs doping density,  $N_b$  is the ZnO doping density,  $e$  is the elementary charge of an electron and  $V_{bi}$  is the built-in potential of our devices. The ZnO doping density is  $10^{17} \text{ cm}^{-3}$ . The built-in potentials ( $V_{bi}$ ) and

doping density ( $N_a$ ) of the PbS-CQDs active layers were obtained from a Mott-Schottky plot following equation S2.

$$\frac{1}{C^2} = \frac{2(V_{bi} - V)}{A^2 e \epsilon_r \epsilon_0 N_a} \quad (S2)$$

*Long-term Air Storage Stability Test:* Unencapsulated devices were stored in darkness and ambient air. The devices were measured under AM 1.5G one-sun illumination ( $100 \text{ mWcm}^{-2}$ ) for every few days until 90 days. The relative humidity was in the range  $43 \pm 3 \%$ , and temperature was  $25 \pm 2 \text{ }^\circ\text{C}$ . After each measurement, the devices were returned to darkness.

*Photo-stability test:* A continuous photo-stability test was performed under AM 1.5G one-sun illumination without any filter. The relative humidity was in the range  $40 \pm 2 \%$  and temperature  $48 \pm 2 \text{ }^\circ\text{C}$ . All devices were unencapsulated and the measurements were performed every several minutes at the maximum power point.

*Sample Analysis:* XPS was performed using a MultiLab 2000 (THERMO VG SCIENCE) system equipped with monochromatized Mg K $\alpha$  radiation at  $h\nu = 1253.6 \text{ eV}$ . The base pressure was  $1 \times 10^{-9} \text{ Pa}$ . UPS measurements were performed using an AXIS-NOVA (Kratos) system with HeI $\alpha$  radiation ( $h\nu = 21.22 \text{ eV}$ ) and a base pressure of  $5 \times 10^{-8} \text{ Torr}$ . WF was calculated following the equation  $\text{WF} = 21.22 - \text{cutoff region from the high binding energy (eV)}$ . The FE-SEM images were taken using a JSM-7610F (JEOL) field-emission scanning electron microscope (FESEM). Photoluminescence measurements were carried out using an SPEX Nanolog 3-211 (Horriba). The signal was analyzed using an NIR spectrometer equipped with an InGaAs array detector (Symphony II). The mobility of ZnO-EAL was characterized using the space charge limited current (SCLC) analysis. The structure of electron-only device was glass/ITO/ZnO/Al. To secure the space charge limited region, 300 nm thickness of ZnO-EALs was used. The Mott-Gurney equation was used to obtain the mobility at trap-free regime following:

$$J = \frac{9\mu\epsilon_0\epsilon_r V^2}{8L^3} \quad (S3)$$

where  $J$  is the current density,  $\mu$  is the mobility,  $\epsilon_0$  is the permittivity under vacuum,  $\epsilon_r$  is the dielectric constant of ZnO,  $L$  is the film thickness and  $V$  is the applied bias.

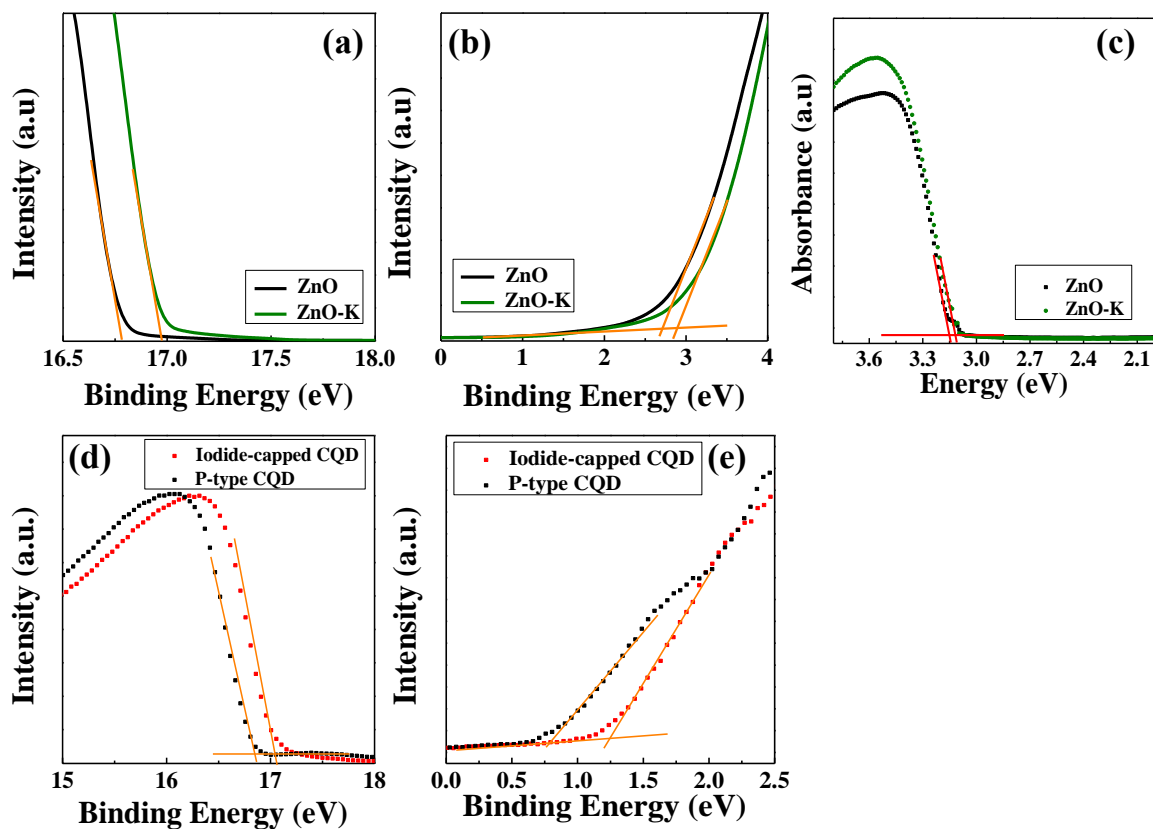

**Figure S1.** UPS analysis results of pristine ZnO and ZnO-K films: (a) Secondary electron cut-off region and (b) Low binding energy region; (c) Absorption spectra of pristine ZnO and ZnO-K films. UPS analysis results of PbS-CQDs: (d) Secondary electron cut-off region; and (e) Low binding energy region.

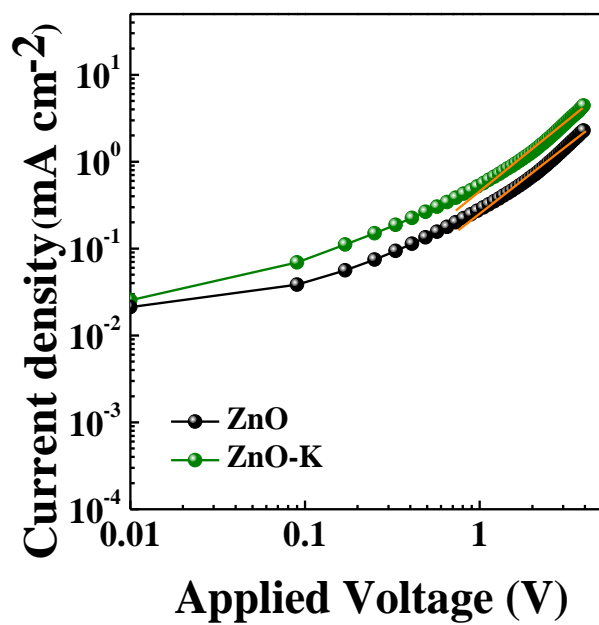

**Figure S2.** Mott-Gurney plot of various ZnO-EALs by SCLC analysis.

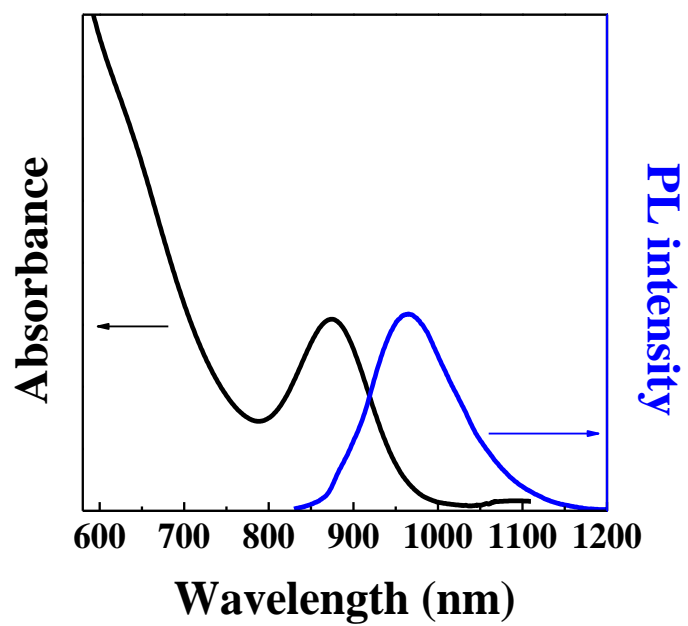

**Figure S3.** UV-vis absorption and PL emission spectrum of the oleate-capped PbS-CQD used in this study.



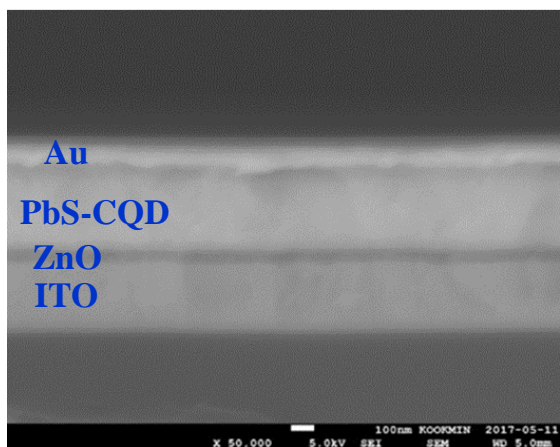

**Figure S4.** Cross-sectional SEM image of a CQDSC device.

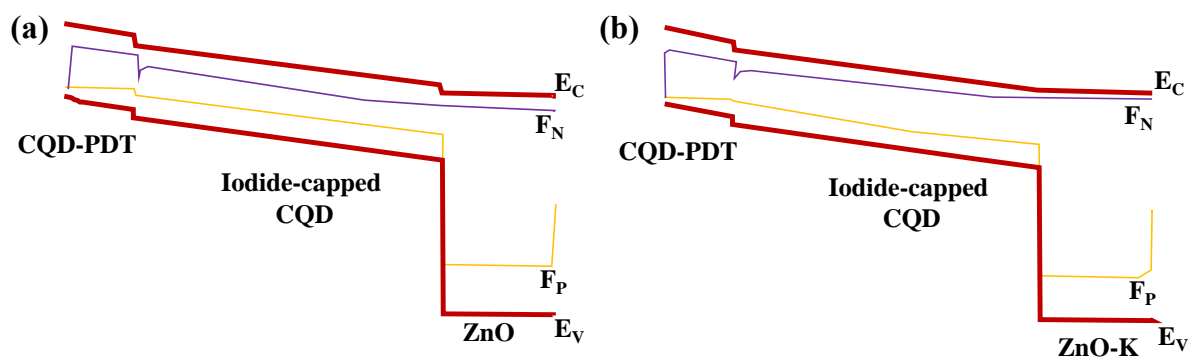

**Figure S5.** Energy band-bending diagram of CQDSCs using (a) pristine ZnO and (b) ZnO-K as the EAL, at short-circuit condition.

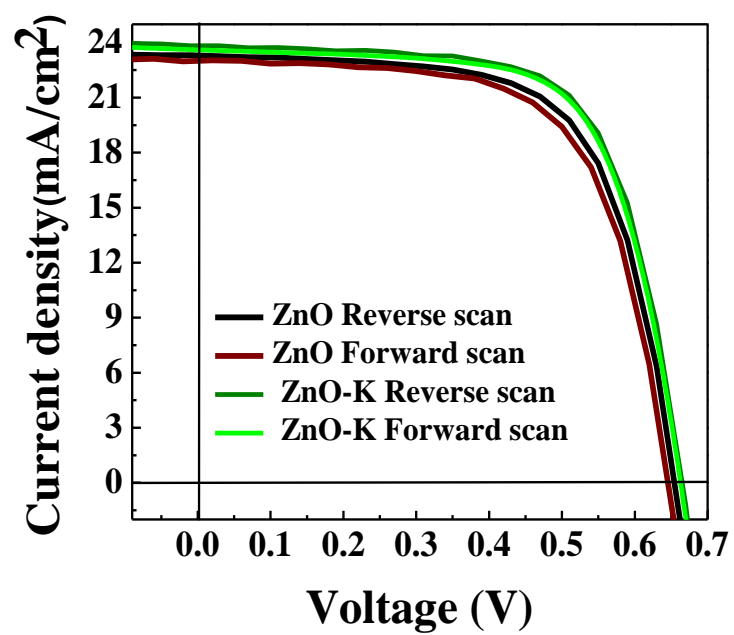

**Figure S6.** *J-V* characteristics of devices using pristine ZnO and ZnO-K under reverse and forward scans.

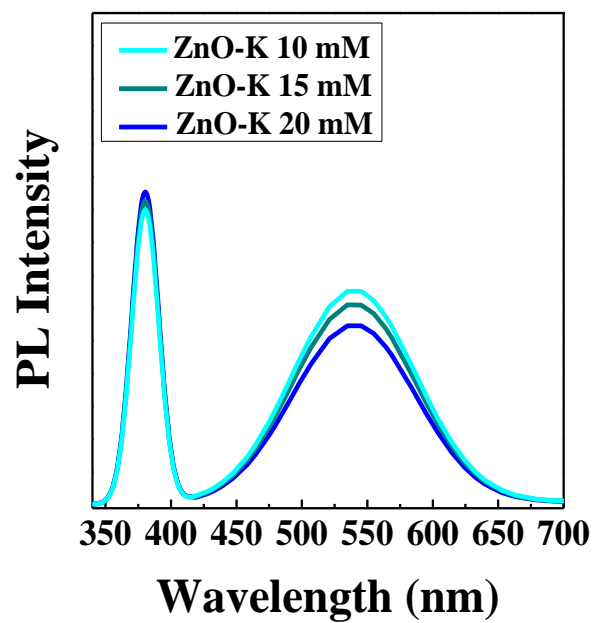

**Figure S7.** PL spectra of ZnO-K treated with various KOH solutions.

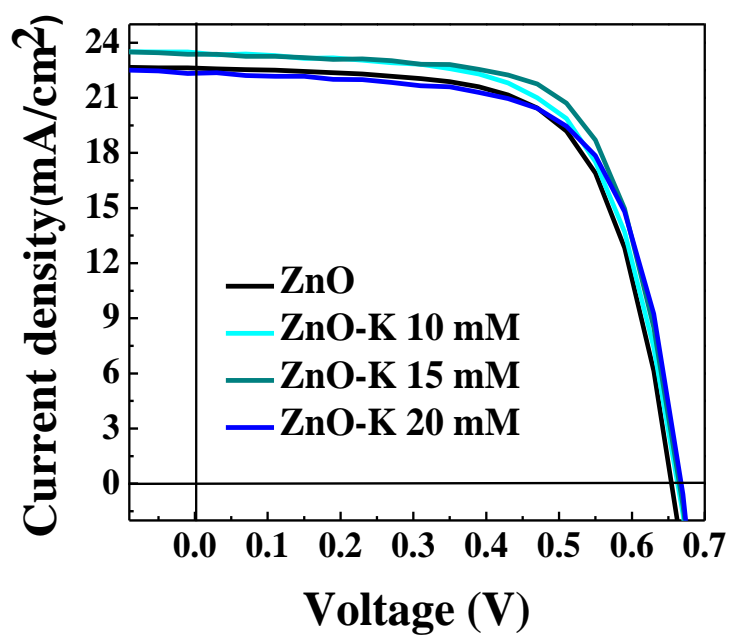

**Figure S8.** *J-V* characteristics of ZnO-K based CQDSCs with various KOH solutions.

**Table S1.** Summary of performance CQDSCs with various KOH solutions.

| <b>EAL</b>         | <b>PCE</b><br>(%) | <b>V<sub>oc</sub> (V)</b> | <b>J<sub>sc</sub></b><br>(mA cm <sup>-2</sup> ) | <b>FF</b> |
|--------------------|-------------------|---------------------------|-------------------------------------------------|-----------|
| <b>ZnO</b>         | 9.62              | 0.64                      | 22.78                                           | 0.65      |
| <b>ZnO-K 10 mM</b> | 10.12             | 0.65                      | 23.41                                           | 0.66      |
| <b>ZnO-K 15 mM</b> | 10.47             | 0.66                      | 23.38                                           | 0.67      |
| <b>ZnO-K 20 mM</b> | 9.28              | 0.66                      | 22.53                                           | 0.63      |

## SI REFERENCES

(S1) Hines, M.A.; Scholes, G.D. Colloidal PbS Nanocrystals with Size-Tunable Near-Infrared Emission: Observation of Post-Synthesis Self-Narrowing of the Particle Size Distribution. *Adv. Mater.* **2003**, *15*, 1844–1849.

(S2) Azmi, R.; Septy, S.; Aqoma, H.; Seo, G.; Ahn, T. K.; Park, M.; Ju, S.-Y.; Lee, J.-W.; Kim, T.-W.; Oh, S.-H.; Jang, S.-Y. Highly Efficient Air-Stable Colloidal Quantum Dot Solar Cells by Improved Surface Trap Passivation. *Nano Energy* **2017**, *39*, 86–94.

(S3) Azmi, R.; Hadmojo, W. T.; Sinaga, S.; Lee, C.-H.; Yoon, S. C.; Jung, I. H.; Jang, S.-Y. High-Efficiency Low-Temperature ZnO Based Perovskite Solar Cells Based on Highly Polar, Nonwetting Self-Assembled Molecular Layers. *Adv. Energy Mater.* **2018**, *8*, 1701683.

(S4) Azmi, R.; Nam, S.Y.; Sinaga, S.; Oh, S.-H.; Ahn, T. K.; Yoon, S. C.; Jung, I. H.; Jang, S.-Y. Improved Performance of Colloidal Quantum Dot Solar Cells Using High Electric-Dipole Self-Assembled Layers. *Nano Energy* **2017**, *39*, 355–362.

(S5) Azmi, R.; Nam, S.Y.; Sinaga, S.; Akbar, Z. A.; Lee, C.-H.; Yoon, S. C.; Jung, I. H.; Jang, S.-Y. High-Performance Dopant-Free Conjugated Small Molecule-Based Hole-Transport Materials for Perovskite Solar Cells. *Nano Energy* **2018**, *44*, 191–198.
